# Supplementary material for: Enhanced electrocatalytic activity of nitrogen-doped olympicene/graphene hybrids for the oxygen reduction reaction
Source: Royal Society of Chemistry journal article supplement (doi:10.1039/c6cp03451a), 2016-01-01
Supplement: c6cp03451a1.pdf [file c6cp03451a1.pdf]

## Electronic Supplementary Information

### Enhanced electrocatalytic activity of nitrogen-doped olympicene/graphene hybrids for oxygen reduction reaction

Xiuli Hou<sup>a</sup>, Peng Zhang<sup>a,\*</sup>, Shuang Li<sup>b</sup>, and Wei Liu<sup>b,\*</sup>

<sup>a</sup> *Institute for Advanced Materials, School of Materials Science and Engineering,  
Jiangsu University, Zhenjiang 212013, China;*

<sup>b</sup> *Nano Structural Materials Center, School of Materials Science and Engineering,  
Nanjing University of Science and Technology, Nanjing 210094, China.*

*\*E-mail: zhangpjlx@ujs.edu.cn, weiliu@njust.edu.cn*

### Computational methods

Spin-polarized DFT calculations were performed using the DMol<sup>3</sup>code.<sup>1,2</sup> The well-known Perdew-Burke-Ernzerhof (PBE) functional with generalized gradient approximation (GGA) is used as the exchange-correlation functional.<sup>3</sup> The core electrons are described by the all electron relativistic (AER) core treat method.<sup>4</sup> The double numerical plus polarization (DNP) is chosen as the atomic orbital basis set.<sup>1</sup> A smearing of 0.005 Ha is applied to the orbital occupation. The real-space global orbital cutoff radius is set to 3.7 Å in our calculations. The convergence tolerances of energy, maximum force and displacement are  $1.0 \times 10^{-5}$  Ha, 0.002 Ha/Å, and 0.005 Å, respectively. The DFT-D2 method of Grimme is employed to include the van der Waals (vdW) interaction in our computations.<sup>5</sup> A conductor-like screening model (COSMO) is used here to describe the water solvent environment, and the dielectric constant is set as 78.54.<sup>6</sup> To quantify the robustness of our computational settings, we

carried out systematically tests for basis set and functionals. We also calculated the ORR process on N<sub>A</sub>-olypicene based on triple numerical plus polarization (TNP), double numerical plus *d*-functions (DND), and hybrid functional B3LYP. As shown in Figure S7, the overpotential of ORR on N<sub>A</sub>-olypicene are determined to be 0.79, 0.84, and 0.75 V from GGA/PBE/TNP, GGA/PBE/DND, and B3LYP/DNP, which are close to that obtained from GGA/PBE/DNP (0.70 V).

The  $E_{ad}$  of ORR intermediates on N-olypicenes was determined as  $E_{ad} = E_{mol} + E_{N-Oly} - E_{mol-N-Oly}$ , where  $E_{mol}$ ,  $E_{N-Oly}$  and  $E_{mol-N-Oly}$  are the electronic energies of an isolated adsorbed molecule, N-olypicenes, and the adsorption systems, respectively.<sup>7,8</sup> By this definition, the positive  $E_{ad}$  values correspond to the exothermic stably adsorption processes.

The free energy diagram was calculated based on the computational hydrogen electrode (CHE) model developed by Nørskov *et al.*<sup>9,10</sup> The reaction free energies ( $\Delta G$ ) of every elemental step are calculated at standard conditions and defined as:  $\Delta G = \Delta E + \Delta ZPE - T\Delta S + \Delta G_{pH} + \Delta G_U$ , where  $\Delta E$  is the DFT reaction energy,  $\Delta ZPE$  is the difference in zero-point energy,  $T$  is the temperature (298.15K),  $\Delta S$  is the change in the entropy,  $\Delta G_{pH}$  and  $\Delta G_U$  are the free energy contributions related to the pH value and electrode potential  $U$ . The important effect of the electrode potential on  $\Delta G$  is quantified by  $\Delta G_U = neU$ , where  $U$  is the electrode potential, and  $n$  is the number of electrons transferred in each elementary step. Note that  $n$  equals to 1 for single coupled proton and electron transfer step.<sup>9,11</sup>  $\Delta G_{pH} = k_B T \ln 10 \times \text{pH}$ , where  $k_B$  is Boltzmann's constant. pH is set as 0 in this work. The free energy of O<sub>2</sub>(g) is derived

as  $G_{\text{O}_2(\text{g})} = 2G_{\text{H}_2\text{O}(\text{l})} - 2G_{\text{H}_2} - 4.92 \text{ eV}$ , because the high-spin ground state of  $\text{O}_2$  molecule cannot be well described in the framework of DFT calculations. The free energy of  $\text{H}_2\text{O}(\text{l})$  is calculated as  $G_{\text{H}_2\text{O}(\text{l})} = G_{\text{H}_2\text{O}(\text{g})} + RT \times \ln(p/p_0)$ , where  $R$  is the ideal gas constant,  $T = 298.15 \text{ K}$ ,  $p = 0.035 \text{ bar}$ , and  $p_0 = 1 \text{ bar}$ .<sup>12</sup>  $G_{\text{H}_2\text{O}(\text{g})}$  can be directly obtained by DFT calculations.

Table S1. Formation energies ( $E_f$ ) of substitutional N atom in olympicene.<sup>a</sup> The corresponding substitutional sites are shown in Fig.S1. All results are in the unit of eV.

|                |       |      |      |      |      |      |      |
|----------------|-------|------|------|------|------|------|------|
| graphitic-type | Site  | A    | B    | C    | D    | E    |      |
|                | $E_f$ | 1.06 | 1.45 | 1.46 | 1.06 | 1.27 |      |
| pyridine-type  | Site  | F    | G    | H    | I    | J    | K    |
|                | $E_f$ | 1.09 | 0.42 | 0.51 | 0.44 | 0.46 | 0.47 |

<sup>a</sup>The nitrogen substitution formation energy ( $E_f$ ) can be determined by  $E_f = E_{N-Oly} +$

$E_C + mE_H - E_{Oly} - E_N$ , where  $E_{N-Oly}$  and  $E_{Oly}$  are the total energies of N-doped

olympicene and pristine olympicene, respectively.  $E_C$ ,  $E_H$ , and  $E_N$  are the total

energies of single atom in graphene, hydrogen molecule, and nitrogen molecule,

respectively.  $m$  equals 0 or 1 for graphitic-type or pyridine-type N-doped olympicenes.

Based on these definitions, the smaller the  $E_f$ , the more energy favorable for nitrogen

atom substituted.

Table S2. Adsorption energies( $E_{ad}$ ) of OOH, O, OH, and CO on N-olympicenes and N-olympicene/graphene hybrids and  $p$ -band center ( $\epsilon_p$ ) of N-olympicene and N-olympicene/graphene hybrids. All results are in unit of eV.

|                                     | OOH   | O    | OH   | CO   | $\epsilon_p$ |
|-------------------------------------|-------|------|------|------|--------------|
| N <sub>A</sub> -olympicene          | 1.24  | 3.32 | 2.54 | 0.14 | -8.315       |
| N <sub>A</sub> -olympicene/Graphene | 0.77  | 2.92 | 2.05 | 0.11 | -8.487       |
| N <sub>D</sub> -olympicene          | 1.71  | 3.78 | 3.01 | 0.15 | -7.946       |
| N <sub>D</sub> -olympicene/Graphene | 1.27  | 3.51 | 2.58 | 0.08 | -8.168       |
| N <sub>G</sub> -olympicene          | 0.04  | 2.88 | 1.36 | 0.07 | -6.384       |
| N <sub>G</sub> -olympicene/Graphene | -0.03 | 2.79 | 1.28 | 0.07 | -6.441       |

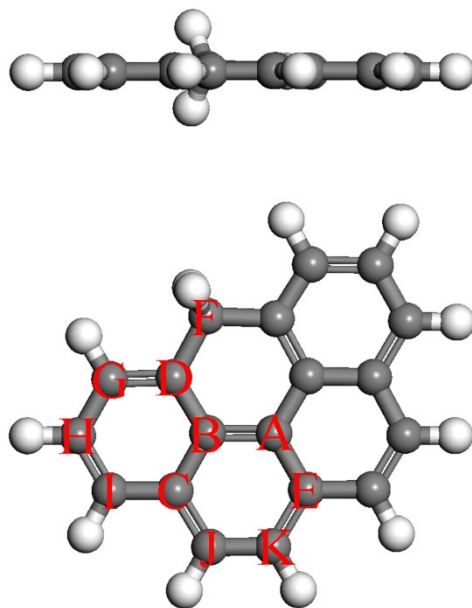

Fig.S1. Atomic structures of pristine olympicene.

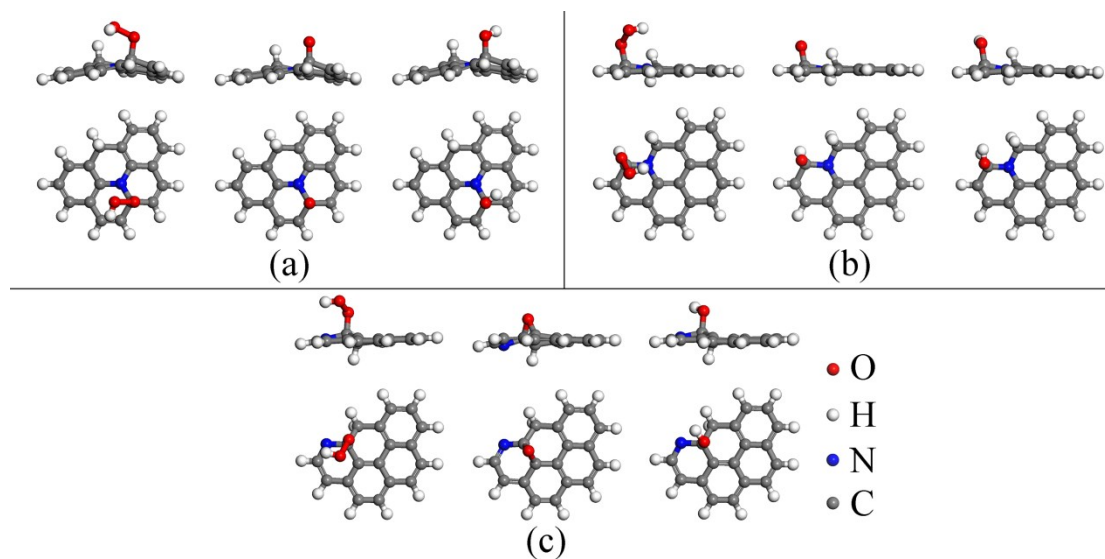

Fig. S2. Preferred adsorption structures of ORR intermediates on  $N_A$ -olympicene (a),  $N_D$ -olympicene (b), and  $N_G$ -olympicene (c).

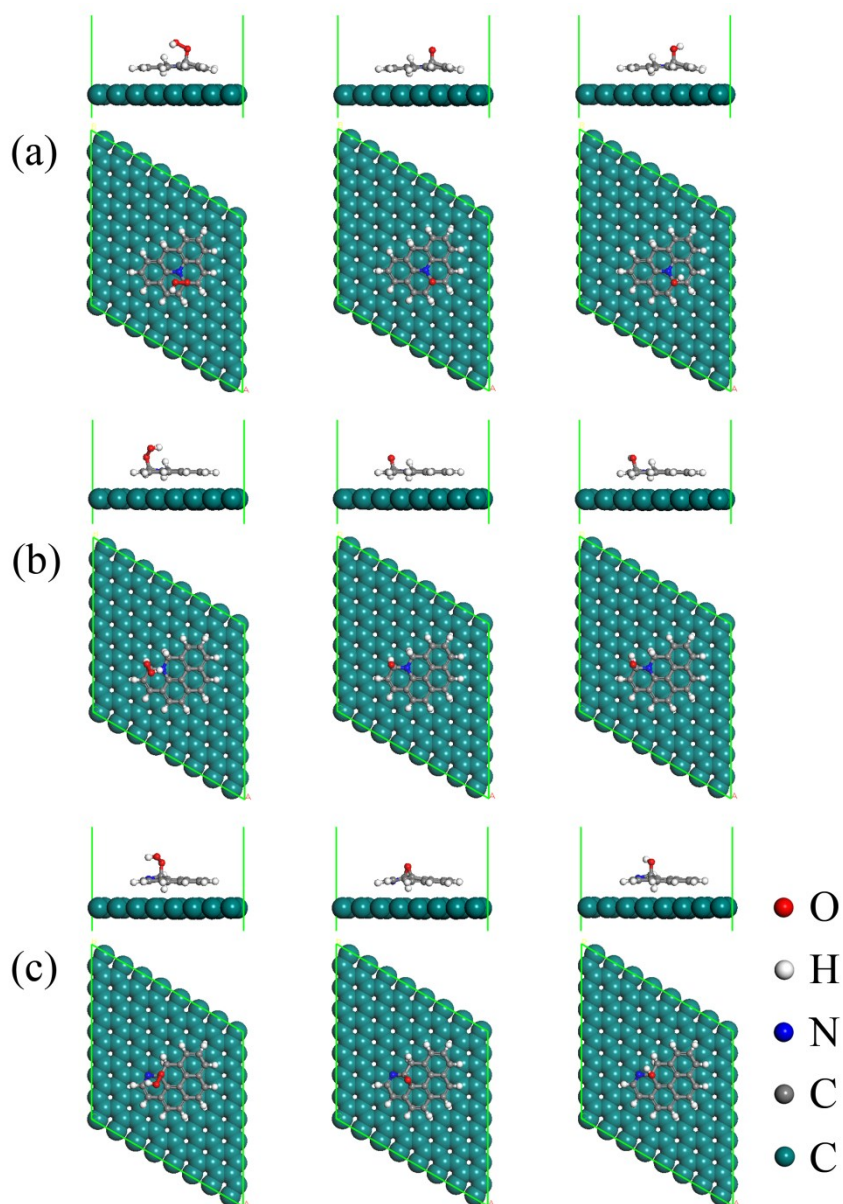

Fig. S3. Preferred adsorption structures of ORR intermediates on  $N_A$ -olympicene/graphene (a),  $N_D$ -olympicene/graphene (b), and  $N_G$ -olympicene/graphene (c).

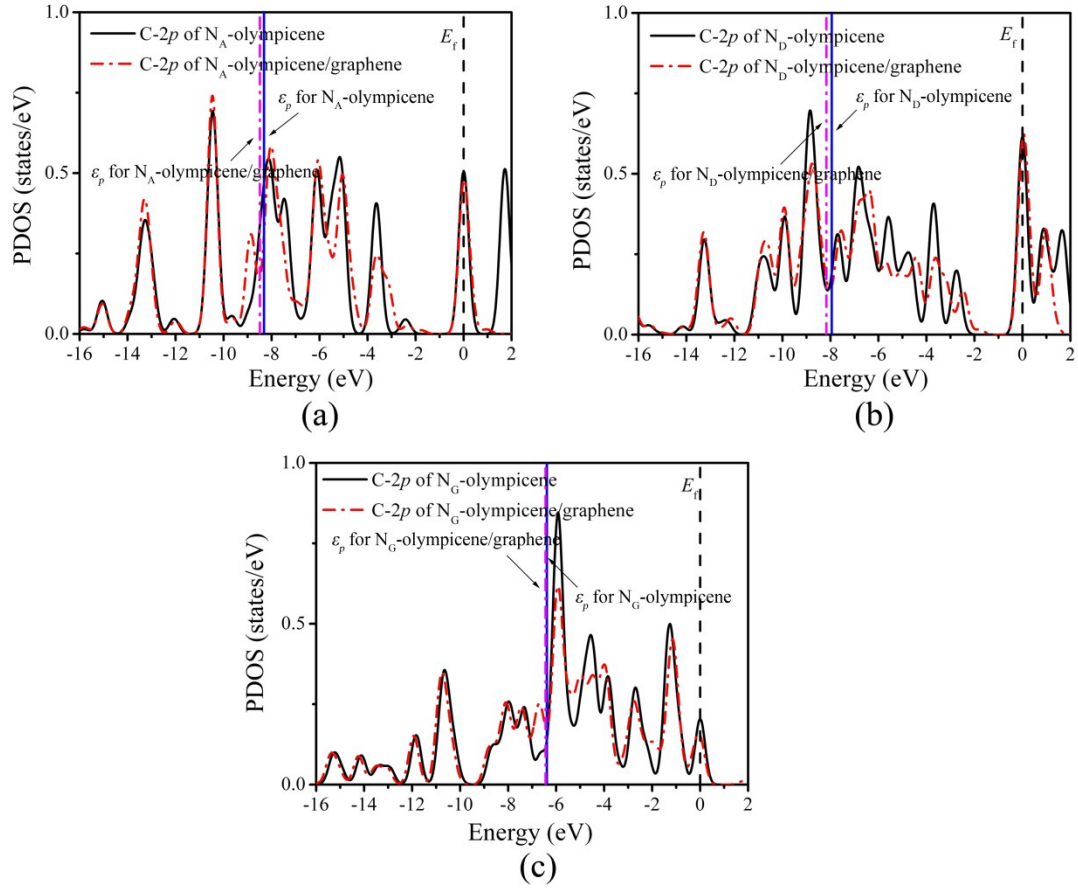

Fig. S4. Partial density of states (PDOS) for C atom near doped N atom in N-olympicenes and N-olympicene/graphene hybrids.  $E_f$  and  $\epsilon_p$  are Fermi energy level and  $p$ -band center.

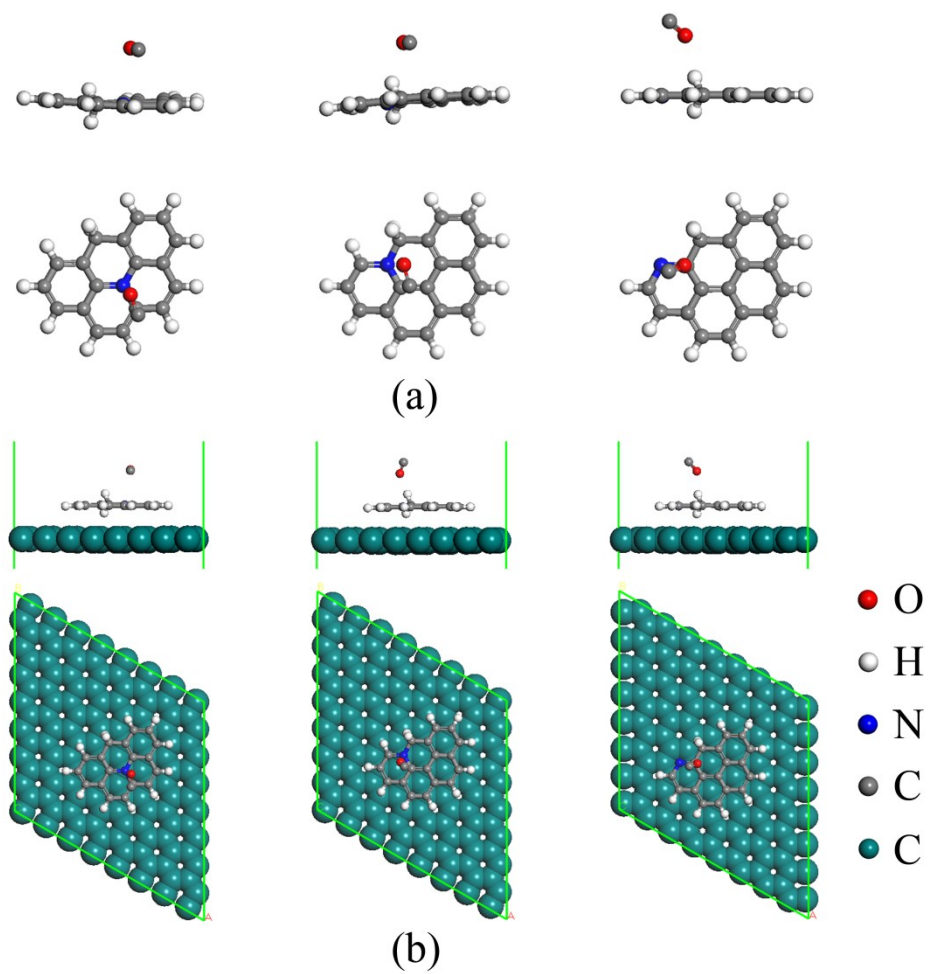

Fig. S5. Adsorption structures for CO on N-olympicenes (a), and N-olympicene/graphene hybrids (b).



Table S3. The number of occupied p-electrons for C atom in N-olympicenes. All results are based on integrated partial density of states. The atomic indexes are shown below. N<sub>A</sub>-oly, N<sub>A</sub>-oly/Gra, N<sub>D</sub>-oly, N<sub>D</sub>-oly/Gra, N<sub>G</sub>-oly and N<sub>G</sub>-oly/Gra stand for N<sub>A</sub>-olympicene, N<sub>A</sub>-olympicene/Graphene, N<sub>D</sub>-olympicene, N<sub>D</sub>-olympicene/Graphene, N<sub>G</sub>-olympicene, and N<sub>G</sub>-olympicene/Graphene.

| Atom index | N <sub>A</sub> -oly | N <sub>A</sub> -oly/Gra | N <sub>D</sub> -oly | N <sub>D</sub> -oly/Gra | N <sub>G</sub> -oly | N <sub>G</sub> -oly/Gra |
|------------|---------------------|-------------------------|---------------------|-------------------------|---------------------|-------------------------|
| 1          | 2.919               | 2.898                   | 2.936               | 2.951                   | 2.866               | 2.855                   |
| 2          | 2.917               | 2.927                   | 2.921               | 2.901                   | 2.864               | 2.848                   |
| 3          | 2.898               | 2.877                   | 2.908               | 2.885                   | 2.756               | 2.751                   |
| 4          | 2.901               | 2.888                   | <b>2.785</b>        | <b>2.806</b>            | 3.839               | 3.803                   |
| 5          | 2.807               | 2.799                   | 2.801               | 2.793                   | 2.801               | 2.784                   |
| 6          | 2.657               | 2.659                   | 2.641               | 2.645                   | 2.830               | 2.810                   |
| 7          | 2.899               | 2.876                   | 2.894               | 2.866                   | 2.905               | 2.882                   |
| 8          | <b>2.686</b>        | <b>2.720</b>            | 2.822               | 2.816                   | 2.775               | 2.757                   |
| 9          | 2.840               | 2.824                   | 3.891               | 3.892                   | <b>2.660</b>        | <b>2.660</b>            |
| 10         | 2.999               | 3.003                   | 2.861               | 2.862                   | 3.025               | 3.019                   |
| 11         | 3.924               | 3.927                   | 2.852               | 2.819                   | 2.721               | 2.727                   |
| 12         | 2.657               | 2.659                   | 2.788               | 2.779                   | 2.824               | 2.801                   |
| 13         | 2.899               | 2.876                   | 2.895               | 2.873                   | 2.886               | 2.868                   |
| 14         | 2.917               | 2.927                   | 2.917               | 2.891                   | 2.808               | 2.803                   |
| 15         | 2.840               | 2.824                   | 2.829               | 2.814                   | 2.730               | 2.740                   |
| 16         | 2.901               | 2.888                   | 2.909               | 2.885                   | 2.854               | 2.847                   |
| 17         | 2.807               | 2.799                   | 2.806               | 2.789                   | 2.839               | 2.811                   |
| 18         | 2.919               | 2.898                   | 2.908               | 2.880                   | 2.804               | 2.802                   |
| 19         | 2.898               | 2.877                   | 2.902               | 2.878                   | 2.891               | 2.877                   |

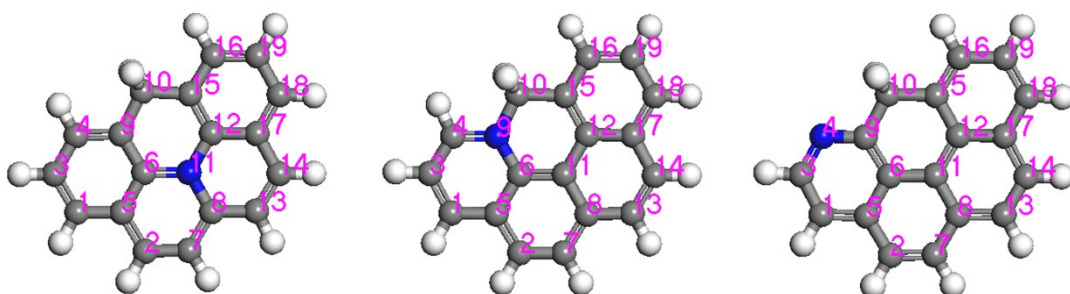

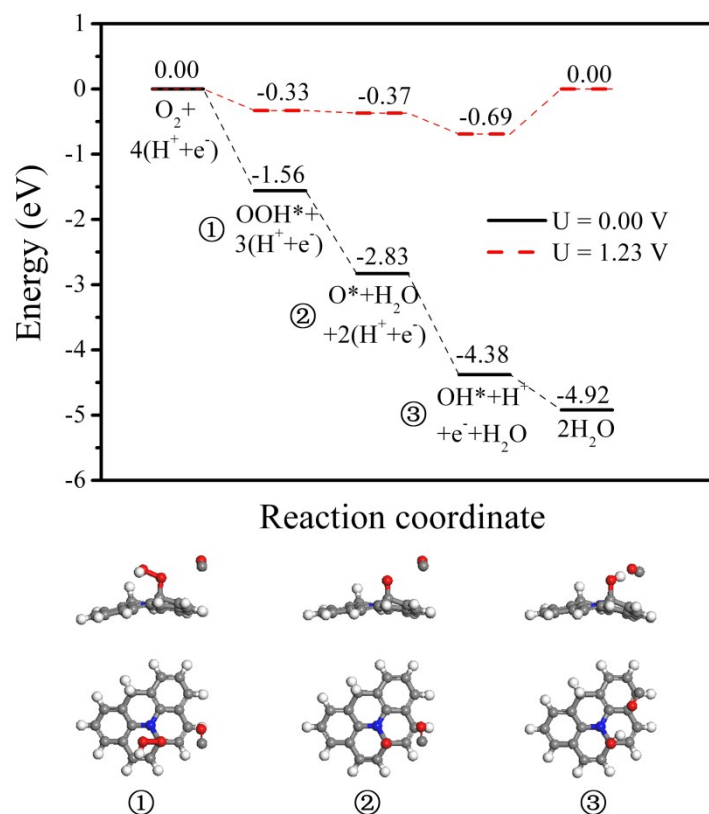

Fig. S6. Schematic free energy diagrams of ORR on  $\text{N}_\text{A}$ -olypicene with the existing of one CO molecule. Selected intermediate structures are also shown.

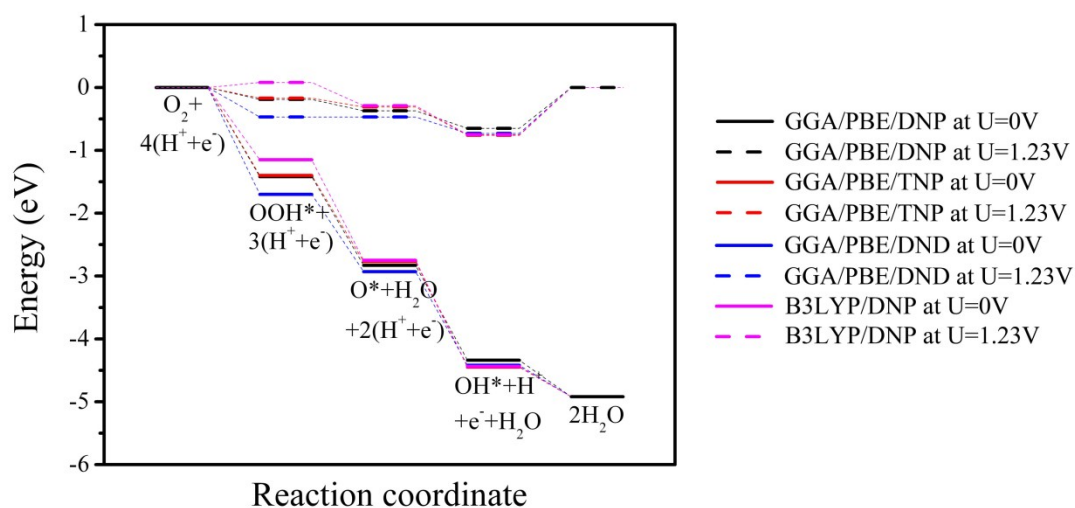

Fig. S7. Schematic free energy diagrams of ORR on  $\text{N}_\text{A}$ -olypicene with different basis sets and functionals.

## References:

- 1 B. Delley, *J. Chem. Phys.*, 1990, **92**, 508.
- 2 B. Delley, *J. Chem. Phys.*, 2000, **113**, 7756.
- 3 J. P. Perdew, K. Burke, and M. Ernzerhof, *Phys. Rev. Lett.*, 1996, **77**, 3865.
- 4 D. D. Koelling, and B. N. Harmon, *J. Phys. C: Solid State Phys.*, 1977, **10**, 3107.
- 5 S. Grimme, *J. Comput. Chem.*, 2006, **27**, 1787.
- 6 B. Delley, *Mol. Simul.*, 2006, **32**, 117.
- 7 W. Liu, A. Tkatchenko, and M. Scheffler, *Acc. Chem. Res.*, 2014, **47**, 3369.
- 8 W. Liu, S. N. Filimonov, J. Carrasco, and A. Tkatchenko, *Nat. Commun.*, 2013, **4**, 2569.
- 9 J. Rossmeisl, J. K. Nørskov, C. D. Taylor, M. J. Janik, and M. Neurock, *J. Phys. Chem. B*, 2006, **110**, 21833.
- 10 J. K. Nørskov, J. Rossmeisl, A. Logadottir, L. Lindqvist, J. R. Kitchin, T. Bligaard, and H. Jónsson, *J. Phys. Chem. B*, 2004, **108**, 17886.
- 11 L. Yu, X. Pan, X. Cao, P. Hu, and X. Bao, *J. Catal.*, 2011, **282**, 183.
- 12 Y. Jiao, Y. Zheng, M. Jaroniec, and S. Z. Qiao, *J. Am. Chem. Soc.*, 2014, **136**, 4394.
